# Supplementary material
Source: PubMed Central journal article supplement (PMC7980135)
Supplement: mmc1.pdf [file mmc1.pdf]

**Cell Host & Microbe, Volume 29**

**Supplemental information**

**SARS-CoV-2 spike variants exhibit differential  
infectivity and neutralization resistance  
to convalescent or post-vaccination sera**

**Alona Kuzmina, Yara Khalaila, Olga Voloshin, Ayelet Keren-Naus, Liora Boehm-Cohen, Yael Raviv, Yonat Shemer-Avni, Elli Rosenberg, and Ran Taube**

**Table 1: Convalescent human sera used in this study, related to STAR**

**Methods**

| Serum | Days post symptoms<br>onset | ELISA IgG<br>Liasonx | NT <sub>50</sub> dilution |
|-------|-----------------------------|----------------------|---------------------------|
| P1    | 63                          | 8                    | 10000                     |
| P3    | 56                          | 37                   | 10000                     |
| P4    | 21                          | 0                    | 79.36                     |
| P5    | 49                          | 6                    | 250                       |
| P6    | 28                          | 21                   | 833.3                     |
| P7    | 21                          | 20                   | 10000                     |
| P8    | 63                          | 68                   | 25000                     |
| P9    | 56                          | 23                   | 20000                     |
| P10   | 49                          | 17                   | 10000                     |
| P11   | 49                          | 11                   | 833.3                     |

**Table 2: Post vaccination human sera used in this study, related to STAR****Methods**

| Serum  | Days post dose #1 | Days post dose #2 | ELISA IgG Liasonx | NT <sub>50</sub> dilution |
|--------|-------------------|-------------------|-------------------|---------------------------|
| V.1.1  | 21                |                   | 79                | 50000                     |
| V.1.2  | 21                |                   | 35                | 33333.3                   |
| V.1.3  | 21                |                   | 63                | 33333.3                   |
| V.1.4  | 21                |                   | 109               | 40000                     |
| V.1.5  | 21                |                   | 119               | 100000                    |
| V.2.2  |                   | 9                 | 259               | 200000                    |
| V.2.3  |                   | 9                 | 254               | 100000                    |
| V.2.4  |                   | 9                 | 190               | 100000                    |
| V.2.5  |                   | 9                 | 156               | 64000                     |
| V.2.6  |                   | 7                 | 400               | 128000                    |
| V.2.7  |                   | 8                 | 223               | 83333.3                   |
| V.2.8  |                   | 11                | 326               | 83333.3                   |
| V.2.9  |                   | 9                 | 341               | 83333.3                   |
| V.2.10 |                   | 8                 | 211               | 50000                     |
| V.2.11 |                   | 10                | 222               | 100000                    |

Sera samples drawn (n=10) from COVID19 recovered individuals were collected at the indicated time points post onset of disease symptoms and screened by SARS-CoV-2 IgG Liasonx ELISA for specific SARS-CoV-2 IgG. Similarly, sera samples drawn from individuals that were vaccinated with the BNT162b2 Pfizer vaccine were also collected at 3 weeks post first dose (V.1; n=5), or 9 days post the second dose (V.2; n=10). Samples

were then monitored by neutralization assays against wild-type or spike mutated SARS-CoV pseudoviruses.
